# Supplementary material for: Connecting perceived flood risk and resilience in Auckland, New Zealand
Source: Research Square preprint supplement (doi:10.21203/rs.3.rs-7547469/v1), 2025-09-10
Supplement: Supplementary file 1 [file 116c586622c51524bef6efdf.xlsx]

## Sheet: Contents
ID	Name
Data_1	Questions for the survey
Data_2	Differential analysis between survey questions

## Sheet: Glossary
Term	Definition
effect	Test statistic
source	Source comparitor question of the test statistic
target	target comparitor question of the test statistic
pval	P-value of test
qval	Adjusted p-value (FDR)

## Sheet: Data_1
ID	full_question	short_question	format
Q1	What is your age range?	Age (Q1)	category
Q2	Please indicate the zone where you reside according to the map:	Zone (Q2)	category
Q3	On a scale of 1-10, how safe do you feel from the risk of flooding in your neighbourhood (with 1 being least safe and 10 being very safe)?	Flood Risk (Q3)	numeric
Q4	What were the causes of the Auckland Anniversary Weekend flooding in 2023? - Selected Choice	Causes of Auckland Anniversary Weekend Flood (Q4)	multi
Q4_5_TEXT	What were the causes of the Auckland Anniversary Weekend flooding in 2023? - Other (please specify) - Text	Other Causes of Auckland Anniversay Weekend Floods (Q4TEXT)	text
Q5	Was your property, neighbouring properties or nearby community facilities (e.g. shops, community centre) affected by the Auckland Anniversary Weekend floods in 2023?	Affected by Flooding (Q5)	category
Q6	If you responded yes to the previous question, could you specify the type of damage that has occurred and has this been resolved since the flooding?	Type of Damage (Q6)	text
Q7	What is the approximate distance between your residence and the source of the flooding (with 1 being close and 5 being far?)	Distance from Flooding Source (Q7)	numeric
Q8	Did you assist friends or neighbours in recent flooding, or were you assisted by friends of neighbours?	Flooding Assistance (Q8)	category
Q9	In your opinion, was there a sufficient emergency flooding response in your neighbourhood?	Sufficient Neighbourhood Flooding Response (Q9)	category
Q10	How worried do you feel about rainfall and any potential future flooding in your neighbourhood?	Rainfall worry (Q10)	category
Q11	How urgent do you think government organisations perceive flood risk in your neighbourhood?	Percieved Goverrnment Urgency (Q11)	category
Q12	On a scale of 1-10, how much do you trust local authorities and emergency management organisations to mitigate flood risk (1 being low trust and 10 being high trust).	Trust in Local Authorities to Manage Flooding (Q12)	numeric
Q13	How would you rank your neighbourhood flood resilience (1 being Low Resilience and 10 being High Resilience)	Neighbourhood Flood Resilience (Q13)	numeric
Q14	Are you aware of any digital tools or technologies that are used to monitor, record or respond to flood risk in your neighbourhood?	Awareness of Flood Related Digital Tools (Q14)	category
Q15	Are you aware of a local meeting point for emergency situations such as flooding?		category
Q16	Have you previously tried to access to information on flood risk in your neighbourhood?	Previous Flood Risk Information Retrieval (Q16)	category
Q17	If you responded yes to the previous question, please indicate where you may access information on flood risk in Auckland?	Previous Flood Risk Information Retrieval Location (Q17)	text
Q18	Which of the following gender categories best describes how you self-identify?	Gender (Q18)	category
Q19	What is your ethnicity? - Selected Choice	Ethnicity (Q19)	category
Q19_6_TEXT	What is your ethnicity? - Other (Please state) - Text
Q20	Does your employment relate to flooding issues?	Employment Relates to Flooding (Q20)
Q21	Did you make, or are you planning to make any changes to your home after the Auckland Anniversary Weekend floods in 2023? Please indicate if applicable: - Selected Choice	Changes to Home (Q21)	multi
Q21_4_TEXT	Did you make, or are you planning to make any changes to your home after the Auckland Anniversary Weekend floods in 2023? Please indicate if applicable: - Other (please specify): - Text	Other Changes to Home (Q21TEXT)	text
Q22	What kind of home do you live in?	Type of Home (Q22)	category
Q23	Do you live on the ground floor or higher?	Floor of Home (Q23)	category
Q24	What is your residential status? - Selected Choice	Residential Status (Q24)	category
Q24_4_TEXT	What is your residential status? - Other (please speciify) - Text	Other Residential Status (Q24TEXT)	text
Q25	How many people live in your household (including you)?	People in Household (Q25)	numeric
Q26	How long have you lived at your current residence?	Time lived in Household (Q26)	category
Q27	Are there any improvements that you like to see for improving flood risk preparedness in your neighbourhood? If yes, please give examples.	Neighbourhood Improvements (Q27)	text
Q28	Is there any additional information you would like to share?	Other Information (Q28)	text
Site	Site	Site	category

## Sheet: Data_2
source	target	effect	pval	test	qval
Q3	Q7	0.514241	2.24231e-05	spearman	0.000584725
Q3	Q12	0.350633	0.000869846	spearman	0.0109214
Q3	Q13	0.744905	1.31846e-16	spearman	1.11739e-14
Q3	Q25	0.0372198	0.732155	spearman	0.870879
Q7	Q3	0.514241	2.24231e-05	spearman	0.000584725
Q7	Q12	0.245977	0.0603912	spearman	0.235317
Q7	Q13	0.492251	7.49521e-05	spearman	0.0014116
Q7	Q25	0.251826	0.054347	spearman	0.219329
Q12	Q3	0.350633	0.000869846	spearman	0.0109214
Q12	Q7	0.245977	0.0603912	spearman	0.235317
Q12	Q13	0.640412	2.39773e-11	spearman	1.16118e-09
Q12	Q25	0.138593	0.200475	spearman	0.438457
Q13	Q3	0.744905	1.31846e-16	spearman	1.11739e-14
Q13	Q7	0.492251	7.49521e-05	spearman	0.0014116
Q13	Q12	0.640412	2.39773e-11	spearman	1.16118e-09
Q13	Q25	0.143344	0.185325	spearman	0.438457
Q25	Q3	0.0372198	0.732155	spearman	0.870879
Q25	Q7	0.251826	0.054347	spearman	0.219329
Q25	Q12	0.138593	0.200475	spearman	0.438457
Q25	Q13	0.143344	0.185325	spearman	0.438457
Q1	Q3	1.54553	0.195918	kruskal	0.438457
Q1	Q7	0.787682	0.532284	kruskal	0.74257
Q1	Q12	0.743577	0.551216	kruskal	0.756527
Q1	Q13	0.478963	0.656129	kruskal	0.831994
Q1	Q25	3.07914	7.38941e-05	kruskal	0.0014116
Q2	Q3	2.29673	0.191905	kruskal	0.438457
Q2	Q7	2.29843	0.126409	kruskal	0.365277
Q2	Q12	2.50204	0.0939424	kruskal	0.327917
Q2	Q13	2.6337	0.0525268	kruskal	0.219329
Q2	Q25	2.11054	0.310838	kruskal	0.558231
Q5	Q3	2.53445	0.00182756	kruskal	0.0199853
Q5	Q12	1.03564	0.244521	kruskal	0.490489
Q5	Q13	2.20724	0.0106172	kruskal	0.0642718
Q5	Q25	-1.99333	0.934148	kruskal	0.953844
Q8	Q3	2.75303	0.000391699	kruskal	0.00639679
Q8	Q7	2.35815	0.00114855	kruskal	0.0129786
Q8	Q12	2.2501	0.00870083	kruskal	0.0556524
Q8	Q13	2.3763	0.00459628	kruskal	0.0399523
Q8	Q25	1.20346	0.189038	kruskal	0.438457
Q9	Q3	2.37034	0.00474577	kruskal	0.0402204
Q9	Q7	0.212986	0.538653	kruskal	0.748374
Q9	Q12	2.42725	0.00346911	kruskal	0.0326674
Q9	Q13	2.74023	0.000432791	kruskal	0.00639679
Q9	Q25	0.896407	0.293643	kruskal	0.547314
Q10	Q3	4.00067	8.21481e-12	kruskal	5.56964e-10
Q10	Q7	2.0947	0.0435363	kruskal	0.204241
Q10	Q12	3.20906	1.73662e-05	kruskal	0.000535194
Q10	Q13	3.75404	2.85906e-09	kruskal	9.69222e-08
Q10	Q25	-0.601187	0.90819	kruskal	0.947312
Q11	Q3	0.607828	0.607038	kruskal	0.803851
Q11	Q7	1.69332	0.142426	kruskal	0.389374
Q11	Q12	3.07187	7.96782e-05	kruskal	0.00142163
Q11	Q13	2.10327	0.042188	kruskal	0.204241
Q11	Q25	1.46116	0.229784	kruskal	0.482506
Q14	Q3	1.72808	0.0599101	kruskal	0.235317
Q14	Q7	1.38373	0.13603	kruskal	0.374911
Q14	Q12	-0.453976	0.727931	kruskal	0.870879
Q14	Q13	-0.22183	0.669968	kruskal	0.831994
Q14	Q25	-1.13463	0.851487	kruskal	0.929487
Q16	Q3	-1.19162	0.581554	kruskal	0.78892
Q16	Q7	-3.95582	0.889957	kruskal	0.945436
Q16	Q12	0.495699	0.2001	kruskal	0.438457
Q16	Q13	-0.700647	0.481146	kruskal	0.715388
Q16	Q25	-2.62766	0.788093	kruskal	0.89029
Q18	Q3	-1.94866	0.931245	kruskal	0.953844
Q18	Q7	0.0462014	0.306133	kruskal	0.558231
Q18	Q12	-1.56726	0.900947	kruskal	0.945436
Q18	Q13	-0.678981	0.776028	kruskal	0.888762
Q18	Q25	-0.706232	0.781336	kruskal	0.888835
Q19	Q3	-0.100065	0.923874	kruskal	0.953844
Q19	Q7	1.25782	0.318466	kruskal	0.568211
Q19	Q12	1.91235	0.14861	kruskal	0.403032
Q19	Q13	1.63032	0.276642	kruskal	0.52392
Q19	Q25	1.10215	0.556047	kruskal	0.76008
Q22	Q3	1.07648	0.230578	kruskal	0.482506
Q22	Q7	0.333289	0.497691	kruskal	0.72723
Q22	Q12	1.50375	0.105476	kruskal	0.327917
Q22	Q13	1.20122	0.189743	kruskal	0.438457
Q22	Q25	0.869842	0.303229	kruskal	0.558231
Q23	Q3	-3.72057	0.987963	kruskal	0.987963
Q23	Q7	1.10128	0.222238	kruskal	0.470866
Q23	Q12	0.624433	0.393138	kruskal	0.64618
Q23	Q13	0.438103	0.460758	kruskal	0.699451
Q23	Q25	-0.629997	0.766212	kruskal	0.886504
Q24	Q3	0.939767	0.464655	kruskal	0.699451
Q24	Q7	0.806081	0.524285	kruskal	0.734432
Q24	Q12	1.60771	0.172431	kruskal	0.42358
Q24	Q13	0.765599	0.541807	kruskal	0.748939
Q24	Q25	0.877867	0.492563	kruskal	0.722852
Q26	Q3	2.5298	0.050748	kruskal	0.219329
Q26	Q7	2.35266	0.104626	kruskal	0.327917
Q26	Q12	2.37998	0.0946036	kruskal	0.327917
Q26	Q13	2.41058	0.0841317	kruskal	0.313414
Q26	Q25	2.05105	0.254972	kruskal	0.503407
Site	Q3	-0.836489	0.510409	kruskal	0.730768
Site	Q7	1.18728	0.0702083	kruskal	0.270461
Site	Q12	-2.37428	0.760296	kruskal	0.883097
Site	Q13	-0.996601	0.543478	kruskal	0.748939
Site	Q25	-2.54587	0.779471	kruskal	0.888835
Q1	Q2	0.291037	0.311226	chisq	0.558231
Q1	Q5	0.311452	0.00662223	chisq	0.0490015
Q1	Q8	0.265217	0.0540124	chisq	0.219329
Q1	Q9	0.243157	0.10424	chisq	0.327917
Q1	Q10	0.177918	0.507984	chisq	0.730768
Q1	Q11	0.197853	0.333203	chisq	0.582247
Q1	Q14	0.146821	0.710357	chisq	0.860039
Q1	Q16	0.262202	0.112527	chisq	0.337582
Q1	Q18	0.340393	0.00313438	chisq	0.0303587
Q1	Q19	0.32025	0.00923262	chisq	0.0569065
Q1	Q22	0.223764	0.196596	chisq	0.438457
Q1	Q23	0.181645	0.468364	chisq	0.699451
Q1	Q24	0.293331	0.00826906	chisq	0.0539079
Q1	Q26	0.438512	7.06878e-05	chisq	0.0014116
Q1	Site	0.26626	0.0860596	chisq	0.313701
Q2	Q1	0.291037	0.311226	chisq	0.558231
Q2	Q5	0.337032	0.104205	chisq	0.327917
Q2	Q8	0.370031	0.0445835	chisq	0.204241
Q2	Q9	0.250956	0.669445	chisq	0.831994
Q2	Q10	0.290896	0.39457	chisq	0.64618
Q2	Q11	0.355634	0.0461049	chisq	0.205652
Q2	Q14	0.315451	0.239797	chisq	0.486015
Q2	Q16	0.254279	0.584126	chisq	0.78892
Q2	Q18	0.355513	0.089805	chisq	0.320462
Q2	Q19	0.316333	0.187295	chisq	0.438457
Q2	Q22	0.473176	0.000434	chisq	0.00639679
Q2	Q23	0.287104	0.44875	chisq	0.699451
Q2	Q24	0.284586	0.465359	chisq	0.699451
Q2	Q26	0.316658	0.131654	chisq	0.365825
Q2	Site	1	2.99108e-17	chisq	5.06988e-15
Q5	Q1	0.311452	0.00662223	chisq	0.0490015
Q5	Q2	0.337032	0.104205	chisq	0.327917
Q5	Q8	0.334108	0.000586365	chisq	0.00795111
Q5	Q9	0.257286	0.0190408	chisq	0.10758
Q5	Q10	0.320186	0.00664917	chisq	0.0490015
Q5	Q11	0.13154	0.807502	chisq	0.90043
Q5	Q14	0.21213	0.0980143	chisq	0.327917
Q5	Q16	0.208405	0.151175	chisq	0.403531
Q5	Q18	0.23995	0.0441557	chisq	0.204241
Q5	Q19	0.298951	0.0523049	chisq	0.219329
Q5	Q22	0.137023	0.520201	chisq	0.731734
Q5	Q23	0.117465	0.672467	chisq	0.831994
Q5	Q24	0.206039	0.293838	chisq	0.547314
Q5	Q26	0.260715	0.45966	chisq	0.699451
Q5	Site	0.221631	0.1044	chisq	0.327917
Q8	Q1	0.265217	0.0540124	chisq	0.219329
Q8	Q2	0.370031	0.0445835	chisq	0.204241
Q8	Q5	0.334108	0.000586365	chisq	0.00795111
Q8	Q9	0.16204	0.328412	chisq	0.579853
Q8	Q10	0.344277	0.00236296	chisq	0.0242741
Q8	Q11	0.212547	0.255416	chisq	0.503407
Q8	Q14	0.523184	1.46747e-09	chisq	5.52745e-08
Q8	Q16	0.218111	0.129302	chisq	0.365277
Q8	Q18	0.123987	0.629902	chisq	0.821596
Q8	Q19	0.153746	0.855457	chisq	0.929487
Q8	Q22	0.19591	0.163241	chisq	0.416081
Q8	Q23	0.116474	0.68457	chisq	0.84083
Q8	Q24	0.185757	0.438371	chisq	0.697689
Q8	Q26	0.261732	0.463293	chisq	0.699451
Q8	Site	0.227577	0.102405	chisq	0.327917
Q9	Q1	0.243157	0.10424	chisq	0.327917
Q9	Q2	0.250956	0.669445	chisq	0.831994
Q9	Q5	0.257286	0.0190408	chisq	0.10758
Q9	Q8	0.16204	0.328412	chisq	0.579853
Q9	Q10	0.287741	0.0254125	chisq	0.134607
Q9	Q11	0.273366	0.0429909	chisq	0.204241
Q9	Q14	0.202395	0.129294	chisq	0.365277
Q9	Q16	0.148668	0.382343	chisq	0.638775
Q9	Q18	0.0967897	0.810121	chisq	0.90043
Q9	Q19	0.246197	0.236429	chisq	0.486015
Q9	Q22	0.182661	0.219524	chisq	0.468041
Q9	Q23	0.175104	0.266189	chisq	0.512716
Q9	Q24	0.135213	0.790493	chisq	0.89029
Q9	Q26	0.241002	0.606636	chisq	0.803851
Q9	Site	0.0519826	0.886701	chisq	0.945436
Q10	Q1	0.177918	0.507984	chisq	0.730768
Q10	Q2	0.290896	0.39457	chisq	0.64618
Q10	Q5	0.320186	0.00664917	chisq	0.0490015
Q10	Q8	0.344277	0.00236296	chisq	0.0242741
Q10	Q9	0.287741	0.0254125	chisq	0.134607
Q10	Q11	0.184908	0.444331	chisq	0.699451
Q10	Q14	0.202241	0.310179	chisq	0.558231
Q10	Q16	0.179148	0.424789	chisq	0.682481
Q10	Q18	0.17579	0.511754	chisq	0.730768
Q10	Q19	0.165345	0.85406	chisq	0.929487
Q10	Q22	0.223394	0.198382	chisq	0.438457
Q10	Q23	0.213066	0.25954	chisq	0.505656
Q10	Q24	0.126309	0.903603	chisq	0.945436
Q10	Q26	0.243385	0.630133	chisq	0.821596
Q10	Site	0.0998565	0.833262	chisq	0.920116
Q11	Q1	0.197853	0.333203	chisq	0.582247
Q11	Q2	0.355634	0.0461049	chisq	0.205652
Q11	Q5	0.13154	0.807502	chisq	0.90043
Q11	Q8	0.212547	0.255416	chisq	0.503407
Q11	Q9	0.273366	0.0429909	chisq	0.204241
Q11	Q10	0.184908	0.444331	chisq	0.699451
Q11	Q14	0.288858	0.0243521	chisq	0.133151
Q11	Q16	0.0705394	0.933366	chisq	0.953844
Q11	Q18	0.155424	0.66225	chisq	0.831994
Q11	Q19	0.132928	0.971118	chisq	0.979789
Q11	Q22	0.189385	0.40452	chisq	0.656135
Q11	Q23	0.0992429	0.947084	chisq	0.961262
Q11	Q24	0.19418	0.372943	chisq	0.638775
Q11	Q26	0.258907	0.489315	chisq	0.721207
Q11	Site	0.241652	0.166001	chisq	0.416847
Q14	Q1	0.146821	0.710357	chisq	0.860039
Q14	Q2	0.315451	0.239797	chisq	0.486015
Q14	Q5	0.21213	0.0980143	chisq	0.327917
Q14	Q8	0.523184	1.46747e-09	chisq	5.52745e-08
Q14	Q9	0.202395	0.129294	chisq	0.365277
Q14	Q10	0.202241	0.310179	chisq	0.558231
Q14	Q11	0.288858	0.0243521	chisq	0.133151
Q14	Q16	0.205375	0.159648	chisq	0.413136
Q14	Q18	0.102605	0.774363	chisq	0.888762
Q14	Q19	0.174767	0.730169	chisq	0.870879
Q14	Q22	0.284125	0.00767125	chisq	0.0520111
Q14	Q23	0.107649	0.741271	chisq	0.875579
Q14	Q24	0.257592	0.0764245	chisq	0.287866
Q14	Q26	0.242947	0.592279	chisq	0.793607
Q14	Site	0.206971	0.155143	chisq	0.407701
Q16	Q1	0.262202	0.112527	chisq	0.337582
Q16	Q2	0.254279	0.584126	chisq	0.78892
Q16	Q5	0.208405	0.151175	chisq	0.403531
Q16	Q8	0.218111	0.129302	chisq	0.365277
Q16	Q9	0.148668	0.382343	chisq	0.638775
Q16	Q10	0.179148	0.424789	chisq	0.682481
Q16	Q11	0.0705394	0.933366	chisq	0.953844
Q16	Q14	0.205375	0.159648	chisq	0.413136
Q16	Q18	0.175171	0.271415	chisq	0.516908
Q16	Q19	0.220332	0.382843	chisq	0.638775
Q16	Q22	0.0892672	0.709886	chisq	0.860039
Q16	Q23	0.220452	0.126759	chisq	0.365277
Q16	Q24	0.231323	0.203381	chisq	0.439147
Q16	Q26	0.220155	0.647373	chisq	0.830738
Q16	Site	0.0377783	0.896389	chisq	0.945436
Q18	Q1	0.340393	0.00313438	chisq	0.0303587
Q18	Q2	0.355513	0.089805	chisq	0.320462
Q18	Q5	0.23995	0.0441557	chisq	0.204241
Q18	Q8	0.123987	0.629902	chisq	0.821596
Q18	Q9	0.0967897	0.810121	chisq	0.90043
Q18	Q10	0.17579	0.511754	chisq	0.730768
Q18	Q11	0.155424	0.66225	chisq	0.831994
Q18	Q14	0.102605	0.774363	chisq	0.888762
Q18	Q16	0.175171	0.271415	chisq	0.516908
Q18	Q19	0.137513	0.920172	chisq	0.953844
Q18	Q22	0.194361	0.169774	chisq	0.420097
Q18	Q23	0.180726	0.240857	chisq	0.486015
Q18	Q24	0.227653	0.184524	chisq	0.438457
Q18	Q26	0.399681	0.00733558	chisq	0.0518075
Q18	Site	0.22914	0.107371	chisq	0.327917
Q19	Q1	0.32025	0.00923262	chisq	0.0569065
Q19	Q2	0.316333	0.187295	chisq	0.438457
Q19	Q5	0.298951	0.0523049	chisq	0.219329
Q19	Q8	0.153746	0.855457	chisq	0.929487
Q19	Q9	0.246197	0.236429	chisq	0.486015
Q19	Q10	0.165345	0.85406	chisq	0.929487
Q19	Q11	0.132928	0.971118	chisq	0.979789
Q19	Q14	0.174767	0.730169	chisq	0.870879
Q19	Q16	0.220332	0.382843	chisq	0.638775
Q19	Q18	0.137513	0.920172	chisq	0.953844
Q19	Q22	0.149554	0.870657	chisq	0.939977
Q19	Q23	0.187804	0.647687	chisq	0.830738
Q19	Q24	0.124163	0.98384	chisq	0.986751
Q19	Q26	0.214076	0.896368	chisq	0.945436
Q19	Site	0.220016	0.384396	chisq	0.638775
Q22	Q1	0.223764	0.196596	chisq	0.438457
Q22	Q2	0.473176	0.000434	chisq	0.00639679
Q22	Q5	0.137023	0.520201	chisq	0.731734
Q22	Q8	0.19591	0.163241	chisq	0.416081
Q22	Q9	0.182661	0.219524	chisq	0.468041
Q22	Q10	0.223394	0.198382	chisq	0.438457
Q22	Q11	0.189385	0.40452	chisq	0.656135
Q22	Q14	0.284125	0.00767125	chisq	0.0520111
Q22	Q16	0.0892672	0.709886	chisq	0.860039
Q22	Q18	0.194361	0.169774	chisq	0.420097
Q22	Q19	0.149554	0.870657	chisq	0.939977
Q22	Q23	0.104727	0.760661	chisq	0.883097
Q22	Q24	0.334126	0.00383548	chisq	0.0342165
Q22	Q26	0.404395	0.00529822	chisq	0.0427642
Q22	Site	0.40149	0.000976692	chisq	0.0114172
Q23	Q1	0.181645	0.468364	chisq	0.699451
Q23	Q2	0.287104	0.44875	chisq	0.699451
Q23	Q5	0.117465	0.672467	chisq	0.831994
Q23	Q8	0.116474	0.68457	chisq	0.84083
Q23	Q9	0.175104	0.266189	chisq	0.512716
Q23	Q10	0.213066	0.25954	chisq	0.505656
Q23	Q11	0.0992429	0.947084	chisq	0.961262
Q23	Q14	0.107649	0.741271	chisq	0.875579
Q23	Q16	0.220452	0.126759	chisq	0.365277
Q23	Q18	0.180726	0.240857	chisq	0.486015
Q23	Q19	0.187804	0.647687	chisq	0.830738
Q23	Q22	0.104727	0.760661	chisq	0.883097
Q23	Q24	0.141653	0.755753	chisq	0.883097
Q23	Q26	0.237516	0.651848	chisq	0.830738
Q23	Site	0.150265	0.383035	chisq	0.638775
Q24	Q1	0.293331	0.00826906	chisq	0.0539079
Q24	Q2	0.284586	0.465359	chisq	0.699451
Q24	Q5	0.206039	0.293838	chisq	0.547314
Q24	Q8	0.185757	0.438371	chisq	0.697689
Q24	Q9	0.135213	0.790493	chisq	0.89029
Q24	Q10	0.126309	0.903603	chisq	0.945436
Q24	Q11	0.19418	0.372943	chisq	0.638775
Q24	Q14	0.257592	0.0764245	chisq	0.287866
Q24	Q16	0.231323	0.203381	chisq	0.439147
Q24	Q18	0.227653	0.184524	chisq	0.438457
Q24	Q19	0.124163	0.98384	chisq	0.986751
Q24	Q22	0.334126	0.00383548	chisq	0.0342165
Q24	Q23	0.141653	0.755753	chisq	0.883097
Q24	Q26	0.365509	0.0110193	chisq	0.0644062
Q24	Site	0.163039	0.515202	chisq	0.730768
Q26	Q1	0.438512	7.06878e-05	chisq	0.0014116
Q26	Q2	0.316658	0.131654	chisq	0.365825
Q26	Q5	0.260715	0.45966	chisq	0.699451
Q26	Q8	0.261732	0.463293	chisq	0.699451
Q26	Q9	0.241002	0.606636	chisq	0.803851
Q26	Q10	0.243385	0.630133	chisq	0.821596
Q26	Q11	0.258907	0.489315	chisq	0.721207
Q26	Q14	0.242947	0.592279	chisq	0.793607
Q26	Q16	0.220155	0.647373	chisq	0.830738
Q26	Q18	0.399681	0.00733558	chisq	0.0518075
Q26	Q19	0.214076	0.896368	chisq	0.945436
Q26	Q22	0.404395	0.00529822	chisq	0.0427642
Q26	Q23	0.237516	0.651848	chisq	0.830738
Q26	Q24	0.365509	0.0110193	chisq	0.0644062
Q26	Site	0.399995	0.0305464	chisq	0.156897
Site	Q1	0.26626	0.0860596	chisq	0.313701
Site	Q2	1	2.99108e-17	chisq	5.06988e-15
Site	Q5	0.221631	0.1044	chisq	0.327917
Site	Q8	0.227577	0.102405	chisq	0.327917
Site	Q9	0.0519826	0.886701	chisq	0.945436
Site	Q10	0.0998565	0.833262	chisq	0.920116
Site	Q11	0.241652	0.166001	chisq	0.416847
Site	Q14	0.206971	0.155143	chisq	0.407701
Site	Q16	0.0377783	0.896389	chisq	0.945436
Site	Q18	0.22914	0.107371	chisq	0.327917
Site	Q19	0.220016	0.384396	chisq	0.638775
Site	Q22	0.40149	0.000976692	chisq	0.0114172
Site	Q23	0.150265	0.383035	chisq	0.638775
Site	Q24	0.163039	0.515202	chisq	0.730768
Site	Q26	0.399995	0.0305464	chisq	0.156897
